# Supplementary material
Source: PubMed Central journal article supplement (PMC2255003)
Supplement: JCI0834450sd.pdf [file JCI0834450sd.pdf]

**Supplementary Figure 1.**

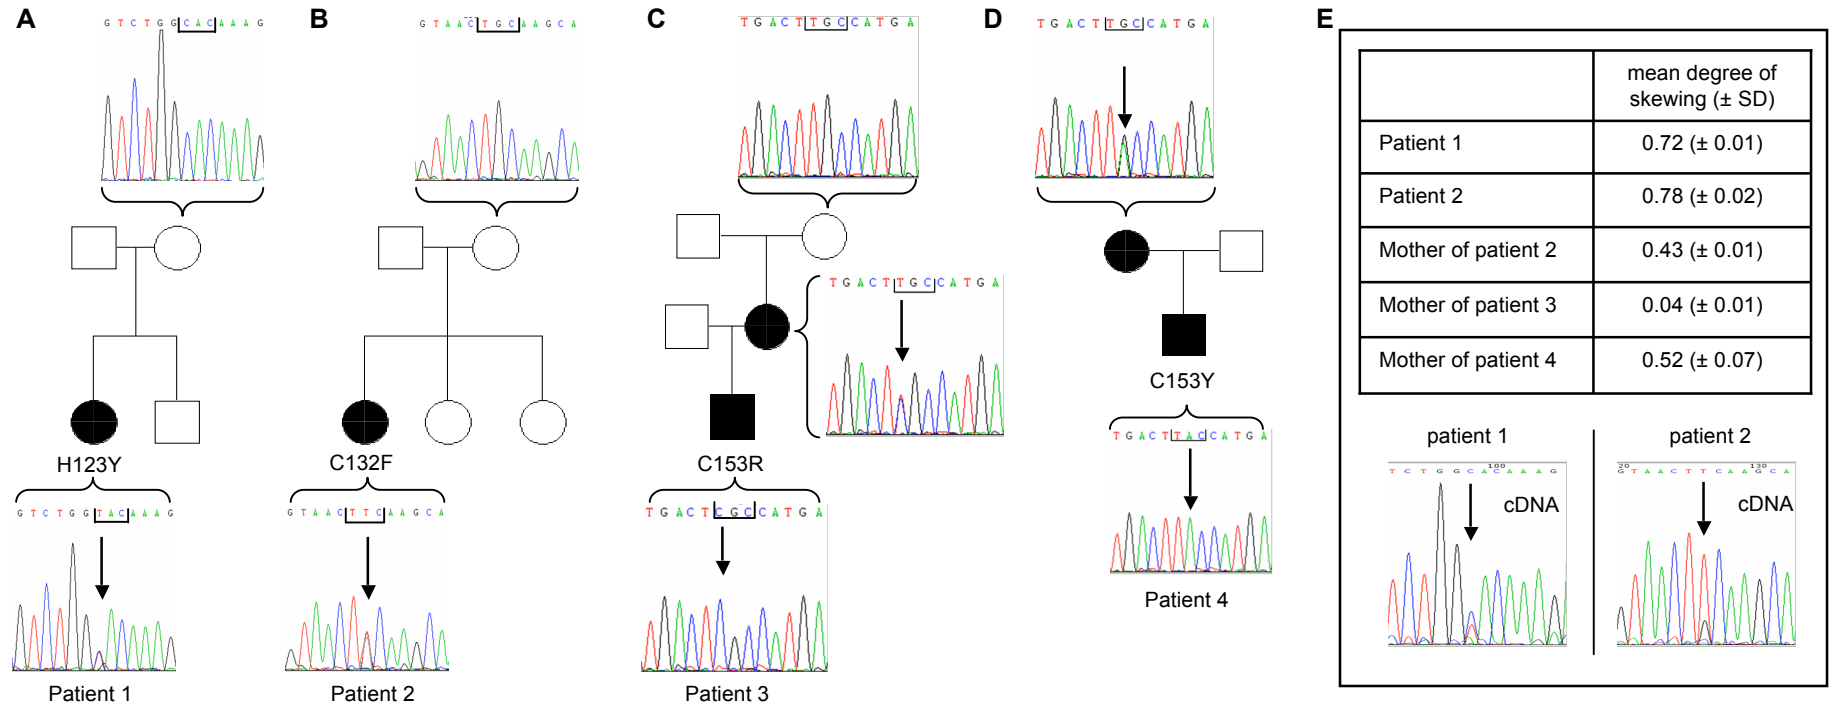

**Supplementary Figure 1.**

**FHL1 mutations and pedigrees of patient families and X inactivation studies.** (A-D), Family structures for patients 1-4, with mutations indicated and genomic sequence tracings displayed. Family members designated by black symbols carried confirmed mutations, family members designated by open symbols were sequenced and found to be wild type (even if the sequence is not shown). Affected mothers were heterozygote for the mutation. The mutations were de-novo in patients 1 and 2 and in the mother of patient 3. Grandparents for patient 4 were not available. (E) Assessment of X-inactivation patterns in female patients, using an assay based on the methylation status near the androgen receptor CAG repeat length polymorphism in leukocyte DNA. Significantly skewed X-inactivation is considered to be present for degrees greater 0.75. There was no significant skewing in the affected mothers. In patient 2 on skeletal muscle RT-PCR the majority of the amplification was from the mutant allele (red T peak, arrow). This patient had a degree of 0.78 (78%) skewed X-inactivation, thus likely preferentially silencing the wild type X chromosome. The degree of skewing in patient 1 does not reach a significant level (0.72), her RT-PCR from muscle suggests insignificantly higher transcription from the wild type allele (blue C peak, arrow).

**Supplementary Figure 2.**

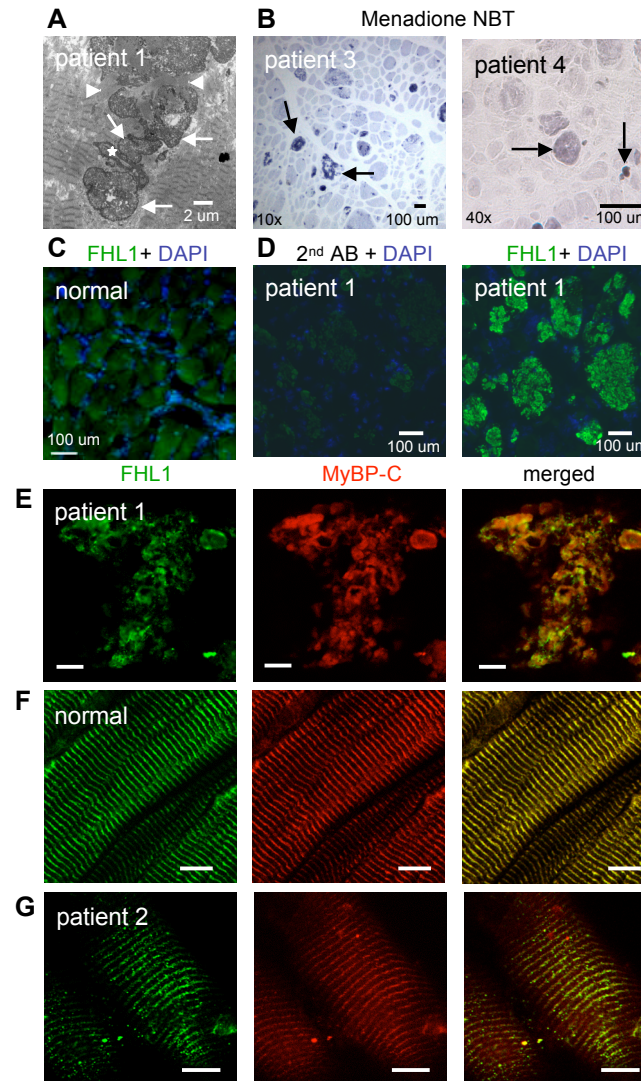

**Supplementary Figure 2.**

**Additional histology** (bars = 10  $\mu$ m, except where stated). (A) EM at lower power of biopsy in patient 1 with cytoplasmic inclusions corresponding to reducing bodies (arrows) some of which abut a myonucleus (star), plus likely cytoplasmic bodies (arrow heads) that are interspersed. (B) Menadione-nitro-blue-tetrazolium staining of biopsies in patient 3 and 4 demonstrating the presence of reducing bodies (arrows). (C) Staining with FHL1 in an additional normal control biopsy without reducing bodies. (D) There is no positive staining of the inclusions with secondary antibody (2<sup>nd</sup> AB) only, indicating specific binding of the primary FHL1 antibody. (E-G) The FHL1 interacting protein MyBP-C is also included in the reducing bodies (E) but there is no obvious difference in its localization to the contractile apparatus between normal (F) and patient muscle (G).

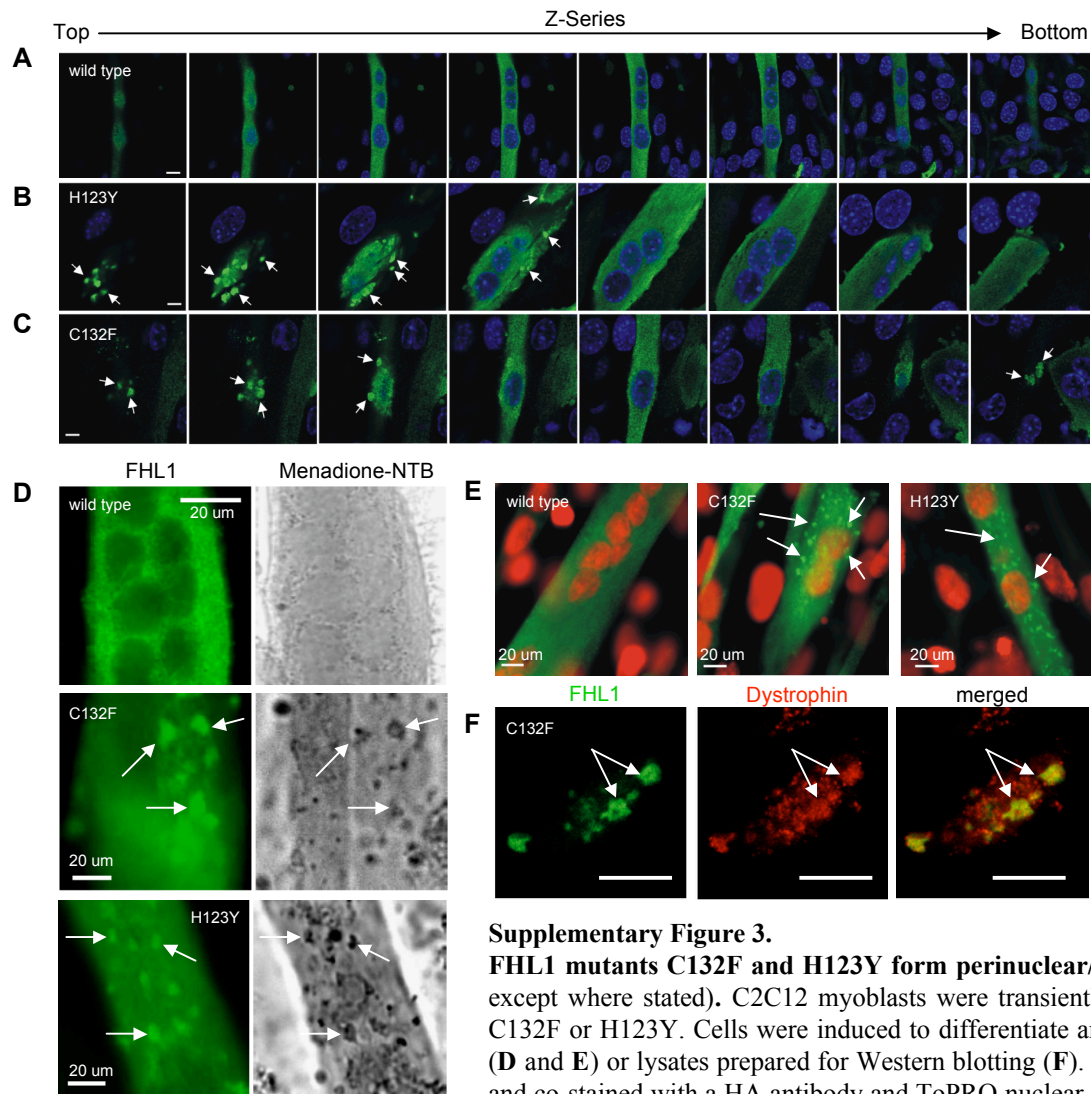

**Supplementary Figure 3.**

**FHL1 mutants C132F and H123Y form perinuclear/cytoplasmic inclusions in C2C12 skeletal myotubes** (bars = 10  $\mu$ m, except where stated). C2C12 myoblasts were transiently transfected with either wild type HA-FHL1, or HA-FHL1 mutants C132F or H123Y. Cells were induced to differentiate and either stained for immunofluorescence (**A** and **B**), menadione-NTB (**D** and **E**) or lysates prepared for Western blotting (**F**). For immunofluorescence studies cells were differentiated for 72 hours and co-stained with a HA antibody and ToPRO nuclear stain. Cells were viewed using laser scanning confocal microscopy and images are presented as a Z-series, scanning from the top to the bottom of the cell, to maximize visualization of inclusions (arrows) formed in cells expressing mutant FHL1 H123Y (**B**) or C132F (**C**), but not FHL1 wild type (**A**). (**D** and **E**) cells were stained with menadione-NTB next to FHL1 (**D**) or FHL1 and propidium iodide to detect nuclei (**E**) and viewed using fluorescence microscope. Arrows point out inclusions. (**F**) Inclusions in differentiated C2C12 cells induced by transfection of mutant FHL1 H123Y or C132F include endogenous muscle proteins dystrophin (arrows). (**G**) For Western blot analysis Triton-soluble and -insoluble lysates were prepared at 0 hr (myoblasts), 48 hr (myocytes) and 96 hr (myotube) differentiation, and 25 mg of protein immunoblotted with a HA antibody. Immunoreactive material is detected in the soluble but not in the insoluble fractions, thus, the mutants are soluble.

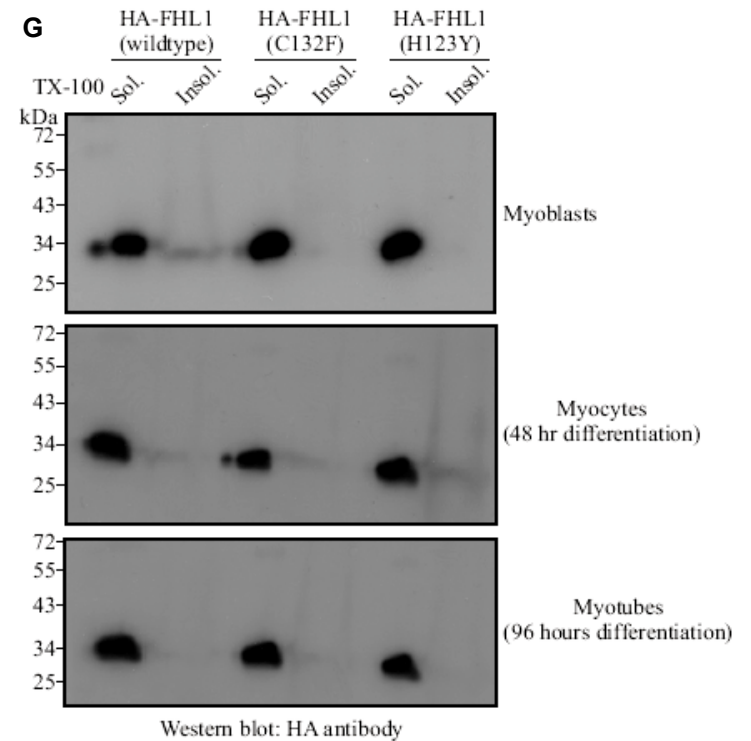

## Supplementary Table 1.

| Protein                                                              | Accession number | Patient 1 | Patient 2 | Number of Peptides |
|----------------------------------------------------------------------|------------------|-----------|-----------|--------------------|
| Four and a half LIM domains protein 1                                | FHL1_HUMAN       | yes       | yes       | 2                  |
| Tropomyosin 1 alpha chain (Alpha-tropomyosin)                        | TPM1_HUMAN (+1)  | yes       | yes       | 1                  |
| Ubiquitin                                                            | UBIQ_HUMAN       | yes       | yes       | 2                  |
| Actin, aortic smooth muscle                                          | ACTA_HUMAN       | yes       | yes       | 2                  |
| Actin, cytoplasmic 1 (Beta-actin)                                    | ACTB_HUMAN       | yes       |           | 2                  |
| Antigen peptide transporter 2 (APT2)                                 | TAP2_HUMAN       |           | yes       | 1                  |
| Carboxypeptidase B precursor                                         | CPBD_HUMAN       |           |           | 1                  |
| Dermcidin precursor (Preproteolysin)                                 | DCD_HUMAN        |           | yes       | 1                  |
| Desmin                                                               | DESM_HUMAN       | yes       |           | 3                  |
| Hemoglobin subunit beta                                              | HBB_HUMAN        | yes       |           | 2                  |
| Homeobox protein Hox-A4                                              | HXA4_HUMAN       | yes       |           | 1                  |
| Interleukin-2 receptor beta chain precursor (IL-2 receptor)          | IL2RB_HUMAN      |           | yes       | 1                  |
| Kinesin-like protein KIF14                                           | KIF14_HUMAN      |           | yes       | 1                  |
| Microtubule-associated serine/threonine-protein kinase-like          | MASTL_HUMAN      | yes       |           | 1                  |
| Myosin light chain 1, skeletal muscle isoform                        | MLE1_HUMAN       | yes       |           | 1                  |
| Protein S100-A7 (S100 calcium-binding protein A7)                    | S10A7_HUMAN      | yes       |           | 1                  |
| Putative GTP-binding protein 9                                       | GTPB9_HUMAN      | yes       |           | 1                  |
| X-linked retinitis pigmentosa GTPase regulator-interacting protein 1 | RPGR1_HUMAN      |           | yes       | 1                  |

**Summary of protein ID data.** All peptides were required to have a probability of greater than 95% and were identified using 2 independent search engines.

## Supplementary Table 2.

|                  | <b>GFP positive cells [in %]</b>               | <b>Total number of cells counted</b> | <b>Cells with inclusions in %</b> |
|------------------|------------------------------------------------|--------------------------------------|-----------------------------------|
| wild type        | 202 [17.53%]                                   | 1152                                 | 0.5%                              |
| mutant H123Y     | 246 [22.12%]                                   | 1112                                 | 1.98%                             |
| mutant C132F     | 268 [20.41%]                                   | 1313                                 | 2.01%                             |
| mean ( $\pm$ SD) | 238.6 ( $\pm$ 33.6);<br>[20.02% ( $\pm$ 2.32)] | 1192.3 ( $\pm$ 106.4)                |                                   |

**Transfection efficiency of wild type and FHL1 mutant into COS-7 cell line.** Transfection efficiency was calculated by counting the total amount of cells and the GFP positive cells in 14 randomized spots 24 hours after transfection of wild type and FHL1 mutants H123Y and C132F into COS-7 cells. There was nearly equal transfection efficiency in wild type and the two mutants. Cells with GFP-positive inclusion at this stage are indicated as percentage of all cells (SD = standard deviation).
